# Supplementary material
Source: PubMed Central journal article supplement (PMC5345933)
Supplement: NIHMS852008-supplement-Supplementary_Information.pdf [file NIHMS852008-supplement-Supplementary_Information.pdf]

**SUPPLEMENTARY**

**Supplementary Information 1 (Table): Ongoing clinical phase III studies of selected inhibitors of cell cycle proteins**

| Inhibitor               | Tumour type                                                                              | Treatment arms                                                                                                            | Timeline                                                                                                  | Study name and estimated enrolment (N)                |
|-------------------------|------------------------------------------------------------------------------------------|---------------------------------------------------------------------------------------------------------------------------|-----------------------------------------------------------------------------------------------------------|-------------------------------------------------------|
| Palbociclib (PD0332991) | • Breast cancer (advanced, ER+ HER2-, first-line treatment)                              | • Palbociclib + letrozole<br>• Placebo + letrozole                                                                        | • Status: active<br>• Study start: February 2013<br>• EPC: February 2016<br>• ESC: February 2017          | • PALOMA-2<br>• NCT01740427<br>• N=650                |
|                         | • Breast cancer (metastatic, ER+ HER2-, after hormone therapy failure)                   | • Palbociclib + fulvestrant<br>• Placebo + fulvestrant                                                                    | • Status: active<br>• Study start: September 2013<br>• EPC: December 2014<br>• ESC: January 2017          | • PALOMA-3<br>• NCT01942135<br>• N=427                |
|                         | • Breast cancer (ER+ HER2-, with high relapse risk after neoadjuvant chemotherapy)       | • Palbociclib + tamoxifen/aromatase inhibitor<br>• Placebo + tamoxifen/aromatase inhibitor                                | • Status: recruiting<br>• Study start: November 2013<br>• EPC: December 2020<br>• ESC: November 2023      | • PENELOPE-B<br>• NCT01864746<br>• N=1,100            |
|                         | • Breast cancer (metastatic, ER+ HER2-, resistant to non-steroidal aromatase inhibitors) | • Palbociclib + exemestane<br>• Capecitabine                                                                              | • Status: recruiting<br>• Study start: March 2014<br>• EPC: January 2018<br>• ESC: January 2018           | • PEARL<br>• NCT02028507<br>• N=348                   |
|                         | • Squamous cell lung cancer (recurrent, stage IIIB-IV)                                   | Part C:<br>• Palbociclib<br>• Docetaxel                                                                                   | • Status: recruiting<br>• Study start: June 2014<br>• EPC: April 2022<br>• ESC: NA                        | • Lung-MAP<br>• NCT02154490<br>• N=10,000 (parts A-E) |
|                         | • Breast cancer (advanced, ER+ HER2-, first-line treatment, Asian postmenopausal women)  | • Palbociclib + letrozole<br>• Placebo + letrozole                                                                        | • Status: recruiting<br>• Study start: March 2015<br>• EPC: October 2017<br>• ESC: October 2017           | • PALOMA-4<br>• NCT02297438<br>• N=330                |
|                         | • Breast cancer (early, ER+ HER2-)                                                       | • Palbociclib + hormone therapy<br>• Placebo + hormone therapy                                                            | • Status: recruiting<br>• Study start: August 2015<br>• EPC: September 2020<br>• ESC: September 2025      | • PALLAS<br>• NCT02513394<br>• N=4,600                |
|                         | • Breast cancer (advanced, ER+ HER2-)                                                    | • Palbociclib + letrozole                                                                                                 | • Status: recruiting<br>• Study start: March 2016<br>• EPC: July 2019<br>• ESC: July 2019                 | • NCT02679755<br>• N=150                              |
|                         | • Breast cancer (advanced, ER+ HER2-, Mexican/Latin American postmenopausal women)       | • Palbociclib + letrozole                                                                                                 | • Status: recruiting<br>• Study start: April 2016<br>• EPC: October 2018<br>• ESC: October 2018           | • NCT02600923<br>• N=130                              |
|                         | • Breast cancer (advanced, ER+ HER2-, African American women)                            | • Palbociclib + letrozole                                                                                                 | • Status: not yet recruiting<br>• Study start: March 2016<br>• EPC: February 2018<br>• ESC: February 2018 | • PALINA<br>• NCT02692755<br>• N=35                   |
| Ribociclib (LEE011)     | • Breast cancer (advanced, ER+ HER2-, first-line treatment, postmenopausal women)        | • Ribociclib + letrozole<br>• Placebo + letrozole                                                                         | • Status: active<br>• Study start: December 2013<br>• EPC: August 2019<br>• ESC: August 2019              | • MONALEESA-2<br>• NCT01958021<br>• N=667             |
|                         | • Breast cancer (advanced, ER+ HER2-, premenopausal women)                               | • Ribociclib + tamoxifen/ letrozole/ anastrozole + goserelin<br>• Placebo + tamoxifen/ letrozole/ anastrozole + goserelin | • Status: recruiting<br>• Study start: November 2014<br>• EPC: February 2018<br>• ESC: February 2018      | • MONALEESA-7<br>• NCT02278120<br>• N=660             |
|                         | • Breast cancer (advanced, ER+ HER2-, postmenopausal women, first/second-line treatment) | • Ribociclib + fulvestrant<br>• Placebo + fulvestrant                                                                     | • Status: recruiting<br>• Study start: February 2015<br>• EPC: November 2016<br>• ESC: November 2016      | • MONALEESA-3<br>• NCT02422615<br>• N=660             |
| Abemaciclib (LY2835219) | • Breast cancer (advanced, ER+ HER2-)                                                    | • Abemaciclib + fulvestrant<br>• Placebo + fulvestrant                                                                    | • Status: active<br>• Study start: July 2014<br>• EPC: February 2017                                      | • MONARCH 2<br>• NCT02107703<br>• N=630               |

|                                    |                                                                                                                                                      |                                                                                                                                                                                                            |                                                                                                                                                                                 |                                                                                                        |
|------------------------------------|------------------------------------------------------------------------------------------------------------------------------------------------------|------------------------------------------------------------------------------------------------------------------------------------------------------------------------------------------------------------|---------------------------------------------------------------------------------------------------------------------------------------------------------------------------------|--------------------------------------------------------------------------------------------------------|
|                                    |                                                                                                                                                      |                                                                                                                                                                                                            | <ul style="list-style-type: none"> <li>• ESC: February 2020</li> </ul>                                                                                                          |                                                                                                        |
|                                    | <ul style="list-style-type: none"> <li>• Breast cancer (advanced, ER+ HER2-, first-line therapy, postmenopausal women)</li> </ul>                    | <ul style="list-style-type: none"> <li>• Abemaciclib + letrozole/ anastrozole</li> <li>• Placebo + letrozole/ anastrozole</li> </ul>                                                                       | <ul style="list-style-type: none"> <li>• Status: active</li> <li>• Study start: November 2014</li> <li>• EPC: June 2017</li> <li>• ESC: July 2021</li> </ul>                    | <ul style="list-style-type: none"> <li>• MONARCH 3</li> <li>• NCT02246621</li> <li>• N=450</li> </ul>  |
|                                    | <ul style="list-style-type: none"> <li>• Non-small-cell lung cancer (stage IV, KRAS-mutant, progressed after platinum-based chemotherapy)</li> </ul> | <ul style="list-style-type: none"> <li>• Abemaciclib</li> <li>• Erlotinib</li> </ul>                                                                                                                       | <ul style="list-style-type: none"> <li>• Status: recruiting</li> <li>• Study start: September 2014</li> <li>• EPC: May 2017</li> <li>• ESC: May 2018</li> </ul>                 | <ul style="list-style-type: none"> <li>• JUNIPER</li> <li>• NCT02152631</li> <li>• N=550</li> </ul>    |
|                                    | <ul style="list-style-type: none"> <li>• Breast cancer (advanced, ER+ HER2-, postmenopausal women)</li> </ul>                                        | <ul style="list-style-type: none"> <li>• Abemaciclib + letrozole/ anastrozole</li> <li>• Placebo + letrozole/ anastrozole</li> <li>• Abemaciclib + fulvestrant</li> <li>• Placebo + fulvestrant</li> </ul> | <ul style="list-style-type: none"> <li>• Status: not yet recruiting</li> <li>• Study start: October 2016</li> <li>• EPC: December 2019</li> <li>• ESC: December 2019</li> </ul> | <ul style="list-style-type: none"> <li>• NCT02763566</li> <li>• N=450</li> </ul>                       |
| <b>Rigosertib</b><br>(ON 01910.Na) | <ul style="list-style-type: none"> <li>• Myelodysplastic syndrome (with excess blasts, failed HMA treatment)</li> </ul>                              | <ul style="list-style-type: none"> <li>• Rigosertib</li> <li>• Best supportive care</li> </ul>                                                                                                             | <ul style="list-style-type: none"> <li>• Status: active</li> <li>• Study start: November 2010</li> <li>• EPC: July 2016</li> <li>• ESC: November 2016</li> </ul>                | <ul style="list-style-type: none"> <li>• ONTIME</li> <li>• NCT01241500</li> <li>• N=299</li> </ul>     |
|                                    | <ul style="list-style-type: none"> <li>• Myelodysplastic syndrome (progressed on or after HMA treatment)</li> </ul>                                  | <ul style="list-style-type: none"> <li>• Rigosertib</li> </ul>                                                                                                                                             | <ul style="list-style-type: none"> <li>• Status: active</li> <li>• Study start: August 2013</li> <li>• EPC: June 2016</li> <li>• ESC: December 2016</li> </ul>                  | <ul style="list-style-type: none"> <li>• NCT01928537</li> <li>• N=67</li> </ul>                        |
|                                    | <ul style="list-style-type: none"> <li>• Myelodysplastic syndrome (after failure of HMA treatment)</li> </ul>                                        | <ul style="list-style-type: none"> <li>• Rigosertib</li> <li>• Physician's choice of treatment</li> </ul>                                                                                                  | <ul style="list-style-type: none"> <li>• Status: recruiting</li> <li>• Study start: October 2015</li> <li>• EPC: June 2018</li> <li>• ESC: September 2018</li> </ul>            | <ul style="list-style-type: none"> <li>• INSPIRE</li> <li>• NCT02562443</li> <li>• N=225</li> </ul>    |
| <b>Volasertib</b><br>(BI 6727)     | <ul style="list-style-type: none"> <li>• Acute myeloid leukaemia (first-line treatment, ineligible for intensive treatment)</li> </ul>               | <ul style="list-style-type: none"> <li>• Volasertib + cytarabine</li> <li>• Placebo + cytarabine</li> </ul>                                                                                                | <ul style="list-style-type: none"> <li>• Status: active</li> <li>• Study start: January 2013</li> <li>• EPC: August 2014</li> <li>• ESC: June 2016</li> </ul>                   | <ul style="list-style-type: none"> <li>• POLO-AML-2</li> <li>• NCT01721876</li> <li>• N=666</li> </ul> |
| <b>Alisertib</b><br>(MLN8237)      | <ul style="list-style-type: none"> <li>• Peripheral T-cell lymphoma (relapsed or refractory)</li> </ul>                                              | <ul style="list-style-type: none"> <li>• Alisertib</li> <li>• Pralatrexate or gemcitabine or romidepsin</li> </ul>                                                                                         | <ul style="list-style-type: none"> <li>• Status: active</li> <li>• Study start: June 2012</li> <li>• EPC: November 2016</li> <li>• ESC: February 2017</li> </ul>                | <ul style="list-style-type: none"> <li>• NCT01482962</li> <li>• N=271</li> </ul>                       |

Data obtained from <http://www.clinicaltrials.gov> (accessed: 26<sup>th</sup> August 2016). EPC, estimated primary completion. ER+ HER2-, oestrogen receptor or progesterone receptor expressing (ER+) and HER2 non-amplified (HER2-) breast cancer. ESC, estimated study completion. HMA, hypomethylating agents (azacitidine or decitabine). N, number of patients. NA, not available.
